# Supplementary material
Source: PubMed Central journal article supplement (PMC2929403)
Supplement: NIHMS195602-supplement-Supplementary.pdf [file NIHMS195602-supplement-Supplementary.pdf]

SUPPLEMENTARY FIGURE 1

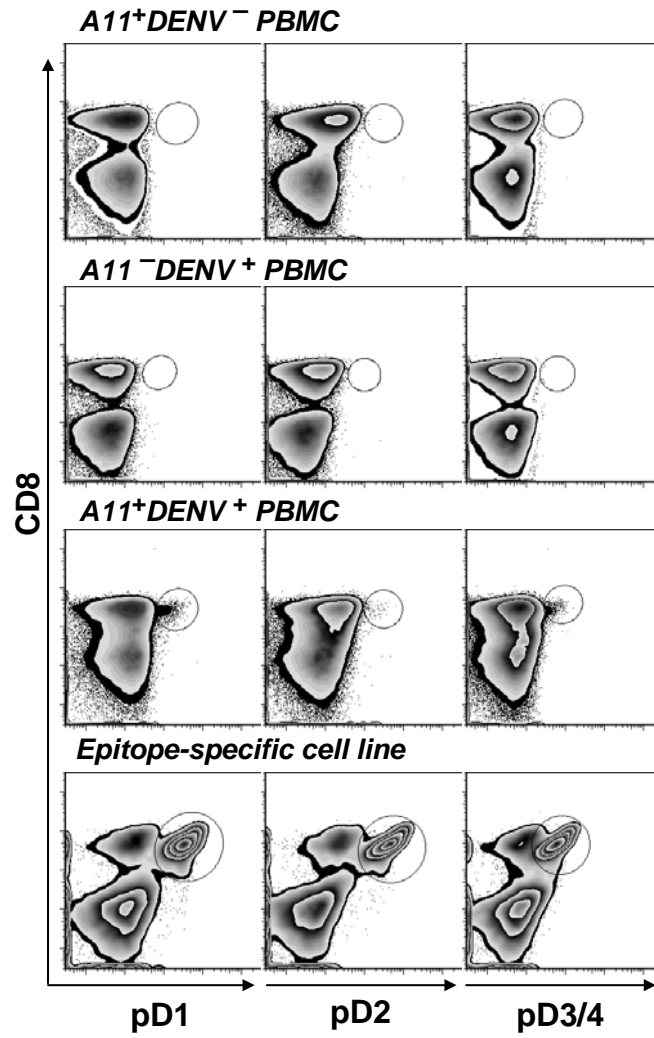

SUPPLEMENTARY FIGURE 2

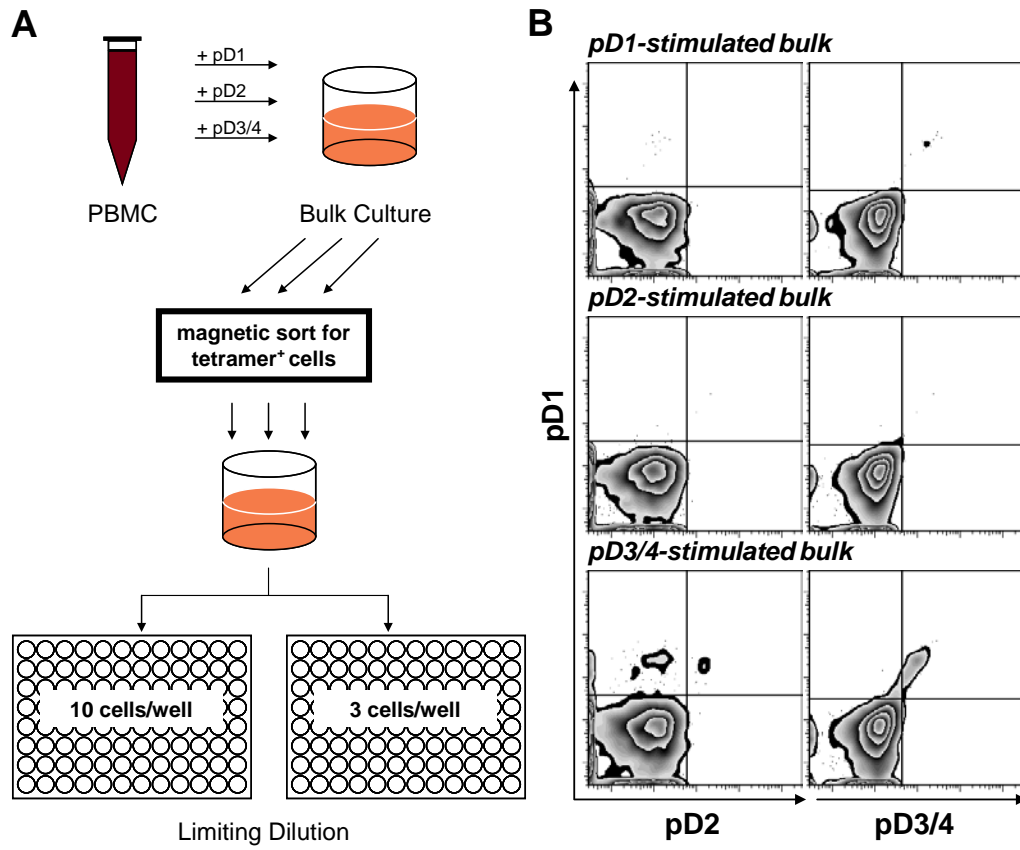

SUPPLEMENTARY TABLE 1

**Supplementary Table 1: Peptide-MHC binding predictions of epitope variants**

| Peptide variant | MHC-I Binding Prediction (nM) <sup>1</sup> |       |       |
|-----------------|--------------------------------------------|-------|-------|
|                 | ann <sup>2</sup>                           | smm   | arb   |
| pD1             | 87.5                                       | 102.1 | 52.0  |
| pD2             | 185.2                                      | 222.5 | 136.3 |
| pD3/4           | 52.8                                       | 71.1  | 37.4  |

<sup>1</sup>Determined by the Immune Epitope Database and Analysis Resource T cell epitope prediction tool for peptide binding to HLA-A\*1101

<sup>2</sup>MHC class I binding prediction methods: ann=Artificial neural network, smm=Stabilized matrix method, arb=Average relative binding
